# Supplementary material
Source: Research Square preprint supplement (doi:10.21203/rs.3.rs-8929672/v1)
Supplement: Supplementary file 1 [file eea6b1fc76f8cf86a6f61d0c.docx]

# SURVEY QUESTIONNAIRE

Study Title: Workplace Violence and Its Association with Job Satisfaction and Psychological Outcomes Among Emergency Department Physicians in Türkiye
Target Population: Emergency Department Physicians
Recall Period: Past 6 Months
Anonymity: No personally identifiable information is collected.

## Section A. Demographic and Work-Related Characteristics

A1. Age (years): __________

A2. Gender: ☐ Female ☐ Male ☐ Prefer not to say

A3. Professional title: ☐ Emergency Medicine Specialist ☐ Resident Physician ☐ General Practitioner

A4. Total professional experience (years): __________

A5. Weekly working hours in the ED: __________ hours

A6. Type of institution: ☐ University hospital ☐ Training & Research hospital ☐ State hospital ☐ Private hospital

A7. Average number of monthly shifts: __________

## Section B. Workplace Violence Exposure (Past 6 Months)

Definitions:

- Verbal violence: shouting, insults, threats

- Physical violence: pushing, hitting, physical assault

- Psychological violence: intimidation, humiliation, persistent hostility/mobbing

- Sexual harassment: unwanted sexual comments, gestures, or physical contact

Response scale for frequency:

0 = Never 1 = Rarely 2 = Sometimes 3 = Often 4 = Always

B1. Verbal violence (frequency): ☐0 ☐1 ☐2 ☐3 ☐4

B2. Physical violence (frequency): ☐0 ☐1 ☐2 ☐3 ☐4

B3. Psychological violence (frequency): ☐0 ☐1 ☐2 ☐3 ☐4

B4. Sexual harassment (frequency): ☐0 ☐1 ☐2 ☐3 ☐4

B5. Most common perpetrator(s) (select all that apply):

☐ Patient ☐ Patient’s relative ☐ Other healthcare worker ☐ Administration/management

B6. Did you formally report any violence incident?

☐ Yes ☐ No ☐ I do not remember

## Section C. Perceived Psychological Impact (Past 6 Months)

C1. Do you think workplace violence decreased your professional motivation?

☐ Strongly disagree ☐ Disagree ☐ Neutral ☐ Agree ☐ Strongly agree

C2. As a result of workplace violence, did you experience any of the following? (select all that apply)

☐ Avoidance of going to work

☐ Burnout / loss of motivation

☐ Sleep disturbance

☐ Perceived need for psychological support

☐ None

C3. In your opinion, are the hospital’s measures to prevent violence adequate?

☐ Yes ☐ No ☐ Partly ☐ No opinion

## Section D. Minnesota Satisfaction Questionnaire (MSQ) – Short Form

Instruction: Please rate each item using the following scale:

1 = Very dissatisfied 2 = Dissatisfied 3 = Neutral 4 = Satisfied 5 = Very satisfied

| No | Item | 1 | 2 | 3 | 4-5 |
| --- | --- | --- | --- | --- | --- |
| 1 | The chance to do something that makes use of my abilities | ☐ | ☐ | ☐ | ☐ |
| 2 | The way my job provides for steady employment | ☐ | ☐ | ☐ | ☐ |
| 3 | The chance to do different things from time to time | ☐ | ☐ | ☐ | ☐ |
| 4 | The chance to be 'somebody' in the community | ☐ | ☐ | ☐ | ☐ |
| 5 | The way my supervisor handles his/her workers | ☐ | ☐ | ☐ | ☐ |
| 6 | The competence of my supervisor in making decisions | ☐ | ☐ | ☐ | ☐ |
| 7 | Being able to do things that don’t go against my conscience | ☐ | ☐ | ☐ | ☐ |
| 8 | The way my job provides for steady employment | ☐ | ☐ | ☐ | ☐ |
| 9 | The chance to do things for other people | ☐ | ☐ | ☐ | ☐ |
| 10 | The chance to tell people what to do | ☐ | ☐ | ☐ | ☐ |
| 11 | The chance to do something that makes use of my abilities | ☐ | ☐ | ☐ | ☐ |
| 12 | The way company policies are put into practice | ☐ | ☐ | ☐ | ☐ |
| 13 | My pay and the amount of work I do | ☐ | ☐ | ☐ | ☐ |
| 14 | The chances for advancement on this job | ☐ | ☐ | ☐ | ☐ |
| 15 | The freedom to use my own judgment | ☐ | ☐ | ☐ | ☐ |
| 16 | The chance to try my own methods of doing the job | ☐ | ☐ | ☐ | ☐ |
| 17 | The working conditions | ☐ | ☐ | ☐ | ☐ |
| 18 | The way my co-workers get along with each other | ☐ | ☐ | ☐ | ☐ |
| 19 | The praise I get for doing a good job | ☐ | ☐ | ☐ | ☐ |
| 20 | The feeling of accomplishment I get from the job | ☐ | ☐ | ☐ | ☐ |
